# Supplementary material
Source: publisher figshare collection journal article supplement (https://karger.figshare.com/ndownloader/files/14107853)
Supplement: Supplementary file 1 [file 14107853]

**Table e-2**

**Tremor Patient Demographics**

| **Patient No.** |  | **Gender** |  | **Age at Diagnosis**  **(years)** |  | **Age at surgery (years)** |  | **Procedure** |  | **Pre-op FTMTRS**a |  | **Post-op FTMTRS**b |
| --- | --- | --- | --- | --- | --- | --- | --- | --- | --- | --- | --- | --- |
| ET1 |  | M |  | childhood |  | 81 |  | Unilateral VIM |  | __ |  | 30 |
| ET2 |  | F |  | 50 |  | 66, 68c |  | Bilateral VIM |  | 52 |  | 33 |
| ET3 |  | F |  | 46 |  | 68 |  | Unilateral VIM |  | 44 |  | 24.5 |
| ET4 |  | M |  | childhood |  | 72 |  | Unilateral VIM |  | 47.5 |  | 47 |
| ET5 |  | M |  | 57 |  | 71 |  | Unilateral VIM |  | 34 |  | 37.5 |
| MS1 |  | F |  | 34 |  | 58 |  | Unilateral VIM |  | 76 |  | N/A |
| PD28 |  | F |  | 56 |  | 59 |  | Unilateral VIM |  | 31 |  | 24 |

Abbreviations: aAssessed at pre-operative evaluation; bPost-operative assessment performed at 6 months; cStaged procedure; ET: essential tremor; F: female; FTMTRS: Fahn Tolosa Marin Tremor Rating Scale assessed at targeted limb; M: male; MS: multiple sclerosis; N/A: not available; PD: Parkinson disease; VIM: ventralis intermedius.
